# Supplementary material
Source: Springer Nature journal article supplement (https://www.springermedizin.de/resource/supplementary/12985_2014_2401_MOESM3_ESM.pdf/9607034)

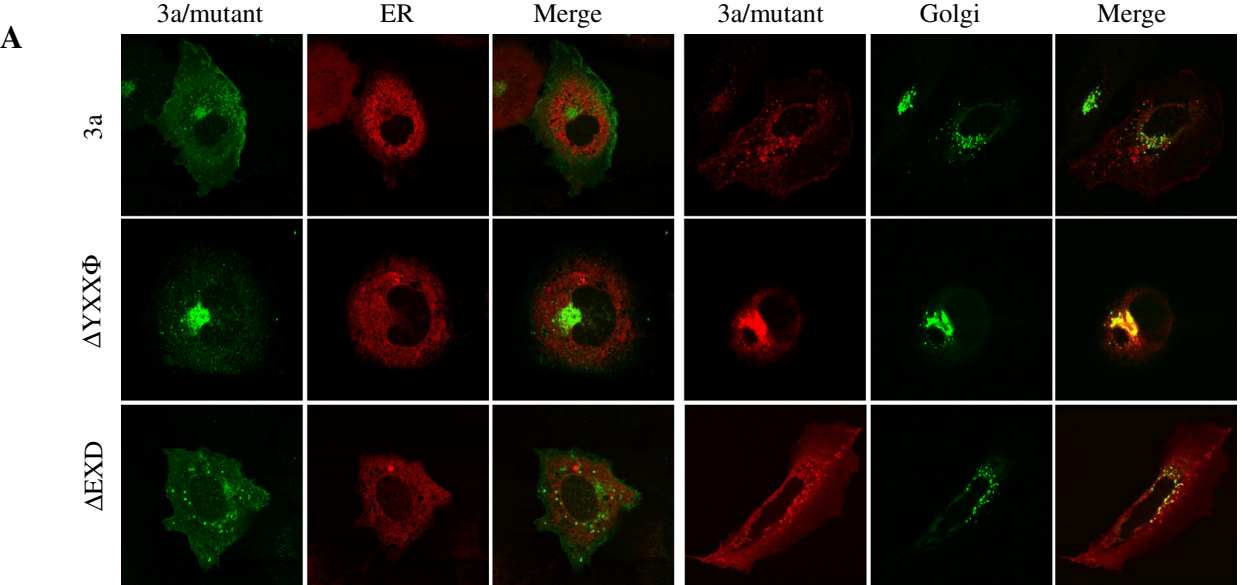

**B**

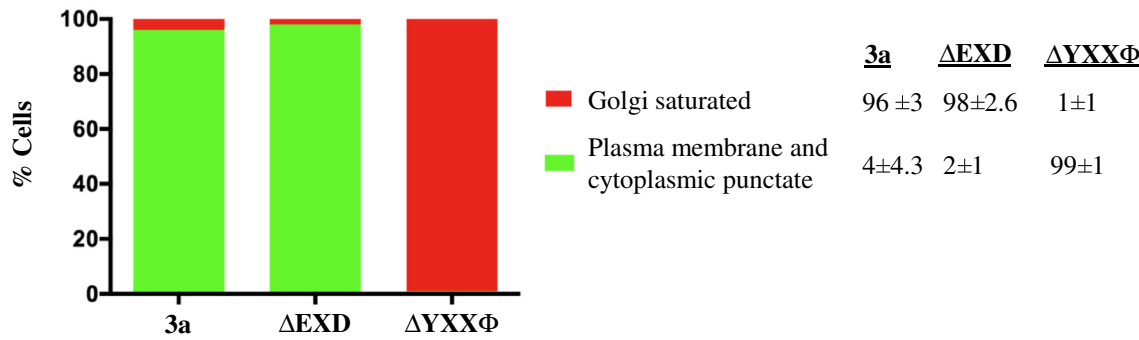

Supplement: MOESM3 [file 9607034]
